# Supplementary material for: All-day fresh water harvesting by microstructured hydrogel membranes
Source: Springer Nature journal article supplement (doi:10.1038/s41467-021-23174-0), 2021-05-14
Supplement: MOESM3 [file 41467_2021_23174_MOESM3_ESM.pdf]

## **Description of Additional Supplementary Files**

File Name: Supplementary Movie 1

Description: Fog collection and transportation on hydrogel micro-trees.
